# Supplementary material
Source: publisher site journal article supplement (https://www.dovepress.com/article/249708)
Supplement: Supplementary file 1 [file get_supplementary_file.php]

(Appendix I)

Name: Age: Gender:

Grade: smoker: No. of cigarette a day:

Please answer the following question with agreed or disagreed:

1. I do not worry much about visiting the dentist
2. I worry about the color of the teeth
3. I have noticed some white sticky deposits on my teeth
4. I think my teeth are getting worse despite my daily brushing
5. I have never been taught professionally how to brush
6. I think I can clean my teeth well without using toothpaste
7. I often check my teeth in a mirror after brushing
8. I worry about having bad breath
9. It is impossible to prevent gum disease with tooth brushing alone
10. I put off going to the dentist until I have a toothache
11. I have had my dentist tell me that I brush very well
12. I do use tooth floss on a regular basis
13. I do use Mouth wash on a regular basis
14. I am satisfied with the appearance of my teeth
15. I am a smoker
16. I smoke more than ten cigarettes per day
17. I am bothered by the color of my gums
18. My gum bleed when I brush my teeth

**Appendix II**

**Case sheet presentation:**

**Date:**

Patient name:

Age: Gender:

Occupation:

Address:

Mobile:

**Past dental history:**

- A past visit to a periodontist?
- Do you clean teeth with a toothbrush? Yes, No h
- If yes, how many times you do it?

One Two Three More h

- Do you clean your teeth with interdental cleaning devices? Yes, No g
- If yes, what these devices?

Tooth floss Toothpicks Interdental brush Others g

**2- Clinical measurements (periodontal parameters): -**

**Plaque index**

|  |  |  |  |  |  |  |  |
| --- | --- | --- | --- | --- | --- | --- | --- |
|  |  |  |  |  |  |  |  |

|  |  |  |  |  |  |  |  |
| --- | --- | --- | --- | --- | --- | --- | --- |
|  |  |  |  |  |  |  |  |

**Gingival index**

|  |  |  |  |  |  |  |  |
| --- | --- | --- | --- | --- | --- | --- | --- |
|  |  |  |  |  |  |  |  |

|  |  |  |  |  |  |  |  |
| --- | --- | --- | --- | --- | --- | --- | --- |
|  |  |  |  |  |  |  |  |
